# Supplementary material
Source: HighWire-hosted journal article supplement (https://bmjopen.bmj.com/content/12/2/e049960)
Supplement: inline-supplementary-material-1 [file inline-supplementary-material-1.pdf]

## Supplementary appendix

### I. Number of valid FNP visits received

- Table S1 BB:2-6 study population data: Valid FNP visits per phase

### II. Study assessment domain, outcomes, principal data providers and data obtained

- Table S2 BB:2-6 Study assessment domains, key and exploratory outcomes and principal data providers

### III. Data accrued from providers

- Table S3 Numbers (%) of mothers and children with data returned by dataset

### IV. Further details of Child in Need outcome

### V. Representativeness of study sample

- Table S4 Maternal characteristics of those in BB:0-2 compared to those in the BB:2-6
- Table S5 Child characteristics of those in the BB:0-2 study compared to those in the BB:2-6 study

### VI. Descriptive secondary outcomes and additional Key Stage 1 results

- Table S6 Child In Need referrals, Children's Social Services referrals and hospital admissions: descriptives
- Table S7 Emergency attendance to hospital by injury or ingestion, by trial arm
- Table S8 Admissions by injury/ingestion type and trial arm
- Table S9 Hospital admissions for injuries and ingestions by trial arm and broken down by age categories
- Table S10 Child health, developmental and educational: descriptives
- Table S11 Children reaching the expected standard in KS1 assessments by trial arm and academic year
- Figure S1 Distribution of children's month of birth by trial arm
- Table S12 Comparison of parameter estimates before and after adjustment for child's month of birth

### VII. Results of planned sub-group analysis

- Table S13 Subgroup analyses for referrals to Children's social care services
- Table S14 Subgroup analyses for child in need status
- Table S15 Predefined subgroup analyses on Early Years Assessment total point score
- Table S16 Subgroup analyses on KS1 assessments reaching the expected standard (RES)
- Table S17 Subgroup analyses on reaching the expected standard in the writing KS1 assessment for 2016/17 academic year

### VIII. Treatment efficacy

### IX. Exploration of surveillance bias upon Child In Need outcome assessment

- Table S18 Baseline maternal characteristics, school readiness outcomes for children referred to CSC and classed as a Child In Need, before the age of 4 years old by intervention arm.

### X. Missing data

### XI. Cost Consequence Analysis

- Table S19 Cost-consequence balance sheet for the family-nurse based intervention for the four years between children's ages 2 and 6.

XII. Postpartum resource use data collected for SPHN contacts

### I. Number of valid FNP visits received

Of the 766 women in the FNP arm in the BB:2-6 cohort, 69 did not enrol for FNP. For the remaining 697 who were randomised and enrolled, 695 had received at least one valid visit and two did not receive any valid visits across the three phases (pregnancy, infancy and toddlerhood). The descriptives in Table S1 are based on 697 women. A greater proportion of women received no visits during the infancy and toddler phases (40 (5.7%) and 98 (14.1%) respectively) compared to the pregnancy phase (6 (0.7%)). This is similar to that reported in the BB:0-2 cohort with comparable median valid visits and proportions reaching the fidelity goals (see Lancet Supplementary appendix Table S11.3).<sup>1</sup>

**Table S1 BB:2-6 study population data: Valid FNP visits per phase**

|                                               | <b>Pregnancy</b> | <b>Infancy</b> | <b>Toddlerhood</b> |
|-----------------------------------------------|------------------|----------------|--------------------|
| N women randomised and enrolled to FNP        | 697              | 697            | 697                |
| Women not receiving any valid visits n(%)     | 6 (0.7)          | 40 (5.7)       | 98 (14.1)          |
| Women receiving at least one valid visit n(%) | 691 (99.3)       | 657 (94.3)     | 599 (85.9)         |
| Valid visits received                         |                  |                |                    |
| Median (25th to 75th centile)                 | 10 (8 to 12)     | 19 (15 to 22)  | 13 (10 to 16)      |
| Mean (SD)                                     | 9.74 (3.42)      | 18.7 (5.97)    | 13.28 (5.46)       |
| Reaching fidelity goal of: n(%)               |                  |                |                    |
| 80%+                                          | 401/697 (57.5)   | -              | -                  |
| 65%+                                          | -                | 364/697 (52.2) | -                  |
| 60%+                                          | -                | -              | 297/697 (42.6)     |

<sup>1</sup> Robling M, Bekkers MJ, Bell K, Butler CC, Cannings-John R, Channon S, et al. Effectiveness of a nurse-led intensive home-visitation programme for first-time teenage mothers (Building Blocks): A pragmatic randomised controlled trial. *Lancet*. 2016;387:146–55. [accessed 2019 Nov 12]. Available from: [http://www.thelancet.com/journals/lancet/article/PIIS0140-6736\(15\)00392-X/fulltext](http://www.thelancet.com/journals/lancet/article/PIIS0140-6736(15)00392-X/fulltext)

## II. Study assessment domain, outcomes and principal data providers

Table S2 BB:2-6 Study assessment domains, key and exploratory outcomes and principal data providers

| Domains                                                                                | Outcomes                                    | Maternal | Child | HES | ONS | NPD         | Data source | Analysis |
|----------------------------------------------------------------------------------------|---------------------------------------------|----------|-------|-----|-----|-------------|-------------|----------|
| <b>Primary:</b> Child in Need status recorded at any time during the follow-up period. | CIN status                                  |          | ✓     |     |     | ✓           | CIN         | LO       |
|                                                                                        | <i>Exploratory:</i>                         |          |       |     |     |             |             |          |
|                                                                                        | Age at first CIN referral                   |          | ✓     |     |     | ✓           | CIN         | SURV     |
|                                                                                        | Number of CIN referrals per child           |          | ✓     |     |     | ✓           | CIN         | PO       |
| <b>Secondary:</b><br>(i) Objective measures of maltreatment                            | CIN categorisation                          |          | ✓     |     |     | ✓           | CIN         | MNOM     |
|                                                                                        | CIN duration                                |          | ✓     |     |     | ✓           | CIN         | SURV     |
|                                                                                        | Referral to Children's social care services |          | ✓     |     |     | ✓           | CIN         | LO       |
|                                                                                        | <i>Exploratory: Age at first referral</i>   |          | ✓     |     |     | ✓           | CIN         | SURV     |
|                                                                                        | Child Protection Plan                       |          | ✓     |     |     | ✓           | CIN         | LO       |
|                                                                                        | Child Protection Plan categorisation        |          | ✓     |     |     | ✓           | CIN         | MNOM     |
|                                                                                        | Looked after status                         |          | ✓     |     |     | ✓           | CLA         | LO       |
|                                                                                        | CLA period of care                          |          | ✓     |     |     | ✓           | CLA         | PO       |
|                                                                                        | Legal status of CLA                         |          | ✓     |     |     | ✓           | CLA         | D        |
| Cause of death                                                                         |                                             |          | ✓     |     | ✓   | ONS- deaths | D           |          |
| (ii) Associated measures of maltreatment                                               | Injuries and ingestions:                    |          |       |     |     |             |             |          |
|                                                                                        | Emergency attendance                        |          | ✓     | ✓   |     |             | A&E         | LO       |
|                                                                                        | Admission to hospital                       |          | ✓     | ✓   |     |             | IP          | LO       |
|                                                                                        | Attendance and/or admission                 |          | ✓     | ✓   |     |             | A&E, IP     | LO       |
|                                                                                        | DNA appointments                            |          | ✓     | ✓   |     |             | OP          | LO       |
|                                                                                        | <i>Exploratory:</i>                         |          |       |     |     |             |             |          |

| Domains                                                  | Outcomes                                                                                       | Maternal | Child | HES | ONS | NPD | Data source                                  | Analysis |
|----------------------------------------------------------|------------------------------------------------------------------------------------------------|----------|-------|-----|-----|-----|----------------------------------------------|----------|
|                                                          | Number of admissions per child                                                                 |          | ✓     | ✓   |     |     | IP                                           | PO       |
|                                                          | Length of hospital admission stay                                                              |          | ✓     | ✓   |     |     | IP                                           | D        |
| (iii) Maternal outcomes                                  | Subsequent pregnancy                                                                           | ✓        |       | ✓   |     |     | OP, IP, Ab                                   | LO       |
|                                                          | Exploratory:<br>Number of births                                                               | ✓        |       | ✓   |     |     | IP                                           | PO       |
|                                                          | Inter-birth interval between first and second child                                            | ✓        |       | ✓   |     |     | IP                                           | SURV     |
| (iv) Costs                                               | Health and Social Care resource use                                                            | ✓        | ✓     | ✓   |     | ✓   | OP, IP, A&E matched with NHS reference costs | D        |
| (v) Child health, developmental and educational outcomes | Special educational needs provision                                                            |          | ✓     |     |     | ✓   | PLASC, AP, PRU Census, EYC                   | LO       |
|                                                          | Disability                                                                                     |          | ✓     | ✓   |     | ✓   | NA                                           | NA       |
|                                                          | Early education attendance                                                                     |          | ✓     |     |     | ✓   | PLASC, EYC                                   | LO       |
|                                                          | School attendance                                                                              |          | ✓     |     |     | ✓   | Absence                                      | LO       |
|                                                          | Early Years assessment                                                                         |          | ✓     |     |     | ✓   | EYFSP                                        | LIN, LO  |
|                                                          | KS1 attainment                                                                                 |          |       |     |     | ✓   | KS1                                          | LO       |
|                                                          | Exploratory:<br>Early education attendance by School or an Ofsted registered PVI establishment |          | ✓     |     |     | ✓   | PLASC, EYC                                   | D        |
|                                                          | Earliest type of day care                                                                      |          | ✓     |     |     | ✓   | EYC                                          | D        |

Ab - Abortions; A&E – Accident and Emergency; AP – Alternative Provision; CIN – Child in Need; CLA – Child Looked After; D – Descriptive; DNA – Did not attend; EYC – Early Years Census; EYFSP – Early years foundation stage profile; FNP – Family Nurse Partnership; HES – Hospital Episode Statistics; IP - Inpatients; KS1 – Key Stage 1; LIN – Linear regression; LO – Logistic; MNOM - multinomial NA - Not available; NPD – National Pupil Database; ONS – Office for National Statistics; OP – Outpatients; PLASC – Pupil Level and School Census; PO-Poisson; PRU – Pupil Referral Unit Census.; PVI – Private, Voluntary or Independent (PVI) establishment; SURV – Survival.

### III. Data accrued from providers

**Table S3 Numbers (%) of mothers and children with data returned by dataset**

|                                                                         | <b>Mothers</b> | <b>Children</b> |
|-------------------------------------------------------------------------|----------------|-----------------|
| <b>Sent for matching to DfE and NHSD</b>                                | <b>N=1537</b>  | <b>N=1547</b>   |
| <b>Department for Education (DfE)</b>                                   |                |                 |
| Not matched                                                             | 1248 (81.2)    | 40 (2.6)        |
| Match to any DfE dataset                                                | 289 (18.8)     | 1507 (97.4)     |
| Pupil Level Annual School Census (PLASC)                                | <5             | 1498 (96.8)     |
| Child in Need (CIN)                                                     | 278 (18.1)     | 414 (26.8)      |
| Children looked after (CLA)                                             | 61 (4.0)       | 52 (3.4)        |
| Early years foundation stage profile (EYFSP)                            | N/A            | 1476 (95.4)     |
| Key Stage one (KS1)                                                     | N/A            | 1472 (95.2)     |
| Early Years Census (EYC)                                                | N/A            | 642 (41.5)      |
| Pupil referral unit (PRU) Census                                        | <5             | 0               |
| Alternative Provision (AP)                                              | <5             | <5              |
| Absence                                                                 | <5             | 1494 (96.6)     |
| <b>NHS Digital (NHSD)</b>                                               |                |                 |
| Not matched                                                             | 36 (2.3)       | 27 (1.7)        |
| Duplicate match                                                         | 0              | 1 (0.06)        |
| Matched to any NHSD dataset                                             | 1501 (97.7)    | 1519 (98.3)     |
| Accident and Emergency (A&E)                                            | 1360 (88.5)    | 1392 (90.0)     |
| Admitted Patient Care (Inpatients) (APC)                                | 1498 (97.5)    | 1507 (97.4)     |
| Outpatient (OP)                                                         | 1495 (97.3)    | 1189 (76.9)     |
| <b>Sent for matching to Department of Health and Social Care (DHSC)</b> | <b>N=1532</b>  | <b>0</b>        |
| Abortions dataset                                                       | 1532 (100)     | NA              |

#### IV. Further details of Child in Need outcome.

In our primary comparative analysis we examined whether the firstborn ('BB:0-2 child') had ever been referred to social services and classed as a child in need at any point between birth and 6 years of age. There is no flag in the Child In Need dataset to identify whether a child is in need after they have been referred to social services. Therefore, CIN was defined (as per DfE methodology)<sup>1</sup> as all children referred to social services, excluding cases where:

- the referral is flagged as being a referral resulting in no further action; or
- the only activity recorded is an assessment and the reason for the closure of the case being that case was closed after assessment with no further action.

- 
1. Department for Education. Characteristics of children in need in England: 2014 to 2015. 2015. [accessed 2019 Nov 12]. Available from:

[https://www.gov.uk/government/uploads/system/uploads/attachment\\_data/file/469740/SFR41-2015\\_Methodology.pdf](https://www.gov.uk/government/uploads/system/uploads/attachment_data/file/469740/SFR41-2015_Methodology.pdf)

#### V. Representativeness of study sample

Scope and purpose: We assessed whether the study sample for BB:2-6 were similar to women recruited to the original BB:0-2 trial.

Conclusion: The BB:2-6 and BB:0-2 cohorts are similar in terms of maternal (Table S4) and baby characteristics (Table S5).

**Table S4 Maternal characteristics of those in BB:0-2 compared to those in the BB:2-6**

|                                                | <b>BB:0-2<br/>N=1618</b> | <b>BB:2-6<br/>N=1537</b> |
|------------------------------------------------|--------------------------|--------------------------|
| <b>Minimisation variables at randomisation</b> |                          |                          |
| <b>Gestational age at baseline n(%)</b>        |                          |                          |
| 16 weeks or more                               | 658 (40.7)               | 636 (41.4)               |
| Less than 16 weeks                             | 959 (59.3)               | 900 (58.6)               |
| <b>Smoking status n(%)</b>                     |                          |                          |
| No                                             | 860 (53.2)               | 822 (53.5)               |
| Yes                                            | 758 (46.8)               | 715 (46.5)               |
| <b>Language n(%)</b>                           |                          |                          |
| English                                        | 1611 (99.6)              | 1530 (99.5)              |
| Other                                          | 6 (0.4)                  | 6 (0.4)                  |
| <i>Missing</i>                                 | <i>1 (0.0)</i>           | <i>0 (0.0)</i>           |

|                                                                                                                                                 | <b>BB:0-2<br/>N=1618</b>        | <b>BB:2-6<br/>N=1537</b>        |
|-------------------------------------------------------------------------------------------------------------------------------------------------|---------------------------------|---------------------------------|
| <b>Trial arm n(%)</b>                                                                                                                           |                                 |                                 |
| FNP                                                                                                                                             | 808 (49.9)                      | 766 (49.8)                      |
| Usual care                                                                                                                                      | 810 (50.1)                      | 771 (50.2)                      |
| <b>Age at recruitment (years) Median (25th to 75th centile)</b>                                                                                 | 17.9 (16.9 to 18.8)             | 17.9 (16.9 to 18.8)             |
| <b>Ethnicity n(%)</b>                                                                                                                           |                                 |                                 |
| White background                                                                                                                                | 1425 (88.1)                     | 1355 (88.2)                     |
| Mixed background                                                                                                                                | 89 (5.5)                        | 82 (5.3)                        |
| Asian background                                                                                                                                | 27 (1.7)                        | 25 (1.6)                        |
| Black background                                                                                                                                | 71 (4.4)                        | 69 (4.5)                        |
| Chinese or Other background                                                                                                                     | 6 (0.4)                         | 6 (0.4)                         |
| <b>Relationship status with baby's father n(%)</b>                                                                                              |                                 |                                 |
| Married                                                                                                                                         | 20 (1.2)                        | 16 (1.0)                        |
| Separated                                                                                                                                       | 165 (10.2)                      | 150 (10.0)                      |
| Closely involved/boyfriend                                                                                                                      | 1222 (75.5)                     | 1168 (76.0)                     |
| Just friends                                                                                                                                    | 211 (13.0)                      | 203 (13.2)                      |
| <b>Live with father of baby n(%)</b>                                                                                                            |                                 |                                 |
| Yes                                                                                                                                             | 368 (22.7)                      | 348 (22.6)                      |
| No                                                                                                                                              | 1112 (68.7)                     | 1061 (69.0)                     |
| Missing                                                                                                                                         | 138 (8.5)                       | 128 (8.3)                       |
| <b>NEET status<sup>a</sup> n(%)</b>                                                                                                             |                                 |                                 |
| Yes                                                                                                                                             | 663 (41.0)                      | 634 (41.2)                      |
| No                                                                                                                                              | 717 (44.3)                      | 678 (44.1)                      |
| Missing                                                                                                                                         | 4 (0.2)                         | 4 (0.3)                         |
| <i>Not applicable (aged 16 years or younger)</i>                                                                                                | 234 (14.5)                      | 221 (14.4)                      |
| <b>Socio-economic status: Overall Index of Multiple Deprivation (IMD) Score<sup>b</sup> Median (25<sup>th</sup> to 75<sup>th</sup> centile)</b> | N=1606<br>38.2 (25.2 to 52.0)   | N=1525<br>38.1 (25.0 to 52.1)   |
| <b>Maternal health and wellbeing</b>                                                                                                            |                                 |                                 |
| <b>Generalized self-efficacy scale (score 10 to 40)<sup>c</sup> Median (25<sup>th</sup> to 75<sup>th</sup> centile)</b>                         | N=1592<br>30.0 (28.0 to 33.0)   | N=1533<br>30.0 (28.0 to 33.0)   |
| <b>Adaptive functioning: Difficulty in at least one basic skill n(%)</b>                                                                        |                                 |                                 |
| Yes                                                                                                                                             | 430 (26.6)                      | 397 (25.8)                      |
| No                                                                                                                                              | 1185 (73.2)                     | 1138 (74.0)                     |
| Missing                                                                                                                                         | 3 (0.2)                         | 2 (0.1)                         |
| <b>Adaptive functioning: Had 3 or less life skills n(%)</b>                                                                                     |                                 |                                 |
| Yes                                                                                                                                             | 434 (26.8)                      | 403 (26.2)                      |
| No                                                                                                                                              | 1178 (72.8)                     | 1129 (73.5)                     |
| Missing                                                                                                                                         | 6 (0.4)                         | 5 (0.3)                         |
| <b>Adaptive functioning: At least one burden n(%)</b>                                                                                           |                                 |                                 |
| Yes                                                                                                                                             | 476 (29.4)                      | 451 (29.3)                      |
| No                                                                                                                                              | 1131 (69.9)                     | 1075 (69.9)                     |
| Missing                                                                                                                                         | 11 (0.7)                        | 11 (0.7)                        |
| <b>Smoking (Participant self-reported) n(%)</b>                                                                                                 |                                 |                                 |
| Ever smoked: Yes                                                                                                                                | 1291 (79.8)                     | 1227 (79.8)                     |
| No                                                                                                                                              | 327 (20.0)                      | 310 (20.2)                      |
| Missing                                                                                                                                         | 0 (0)                           | 0 (0)                           |
| <b>Child characteristics</b>                                                                                                                    | <b>BB:0-2 sample<br/>N=1510</b> | <b>BB:2-6 sample<br/>N=1547</b> |
| <b>Trial arm n(%)</b>                                                                                                                           |                                 |                                 |



|                                           | <b>BB:0-2<br/>N=1618</b> | <b>BB:2-6<br/>N=1537</b> |
|-------------------------------------------|--------------------------|--------------------------|
| FNP                                       | 742 (49.1)               | 773 (50.0)               |
| Usual Care                                | 768 (50.9)               | 774 (50.0)               |
| <b>Gender n(%)</b>                        |                          |                          |
| Male                                      | 777 (51.5)               | 787 (50.9)               |
| Female                                    | 732 (48.5)               | 758 (40.1)               |
| Missing                                   | 1                        | 72 <sup>d</sup>          |
| <b>Birthweight (grams) Mean (sd)</b>      | 3207.3 (599.6)           | 3219.6 (580.7)           |
| Missing <sup>c</sup>                      |                          | 71                       |
| <b>Neonatal unit (NNU) admission n(%)</b> |                          |                          |
| Yes                                       | 149 (10.0)               | 142 (9.2)                |
| Missing from data collection              | 13                       | 11                       |
| Missing                                   | Not applicable           | 71 <sup>d</sup>          |

<sup>a</sup> Definition of NEET status: Not in education employment or training (applicable only to those whose age at end of previous academic year at time of baseline interview was >16)

<sup>b</sup> Higher IMD score indicated more deprivation. Mean IMD Score for England in 2010 was 21.67<sup>60</sup>;

<sup>c</sup> Higher score indicates higher level of self-efficacy

<sup>d</sup> Mothers were withdrawn in BB:0-2 but are included in BB:2-6

**Table S5 Child characteristics of those in the BB:0-2 study compared to those in the BB:2-6 study**

|                                           | <b>BB:0-2 sample<br/>N=1510</b> | <b>BB:2-6 sample<br/>N=1547</b> |
|-------------------------------------------|---------------------------------|---------------------------------|
| <b>Trial arm n(%)</b>                     |                                 |                                 |
| FNP                                       | 742 (49.1)                      | 773 (50.0)                      |
| Usual Care                                | 768 (50.9)                      | 774 (50.0)                      |
| <b>Gender n(%)</b>                        |                                 |                                 |
| Male                                      | 777 (51.5)                      | 787 (50.9)                      |
| Female                                    | 732 (48.5)                      | 758 (40.1)                      |
| Missing                                   | 1                               | 72 <sup>a</sup>                 |
| <b>Birthweight (grams) Mean (sd)</b>      | 3207.3 (599.6)                  | 3219.6 (580.7)                  |
| Missing <sup>a</sup>                      |                                 | 71                              |
| <b>Neonatal unit (NNU) admission n(%)</b> |                                 |                                 |
| Yes                                       | 149 (10.0)                      | 142 (9.2)                       |
| Missing from data collection              | 13                              | 11                              |
| Missing <sup>a</sup>                      | Not applicable                  | 71*                             |

<sup>a</sup> Mothers were withdrawn in BB:0-2 but are included in BB:2-6

## VI. Descriptive secondary outcomes and additional Key Stage 1 results

**Table S6 Child In Need referrals, Children's Social Services referrals and hospital admissions: descriptives**

| <b>Outcome</b>                                                 | <b>FNP</b>   | <b>Usual care (UC)</b> |
|----------------------------------------------------------------|--------------|------------------------|
| <b>Child in Need (CIN) Referrals</b>                           | <b>N=161</b> | <b>N=162</b>           |
| Age at first CIN referral (days)                               |              |                        |
| Pre birth to < 1 year                                          | 12 (7.5%)    | 5 (3.1%)               |
| 1 to <2 years                                                  | 6 (3.7%)     | 6 (3.7%)               |
| 2 to <3 years                                                  | 15 (9.4%)    | 28 (17.3%)             |
| 3 to <4 years                                                  | 27 (16.9%)   | 23 (14.2%)             |
| 4 to <5 years                                                  | 47 (29.4%)   | 39 (24.1%)             |
| 5 to <6 years                                                  | 33 (20.6%)   | 41 (25.3%)             |
| 6 to <7 years                                                  | 20 (12.5%)   | 20 (12.3%)             |
| Missing                                                        | 1            | 0                      |
| Unique* number of CIN referrals per child                      |              |                        |
| 1 case                                                         | 110 (68.3%)  | 110 (67.9%)            |
| 2 cases                                                        | 42 (26.1%)   | 42 (25.9%)             |
| 3 or more cases                                                | 9 (5.5%)     | 10 (6.1%)              |
| CIN cases closed at 31 <sup>st</sup> March 2017                | 116 (72.0%)  | 110 (67.9%)            |
| <b>Referral to Children's social care services (CSCS)</b>      | <b>N=760</b> | <b>N=746</b>           |
| Total referrals made N                                         | 339          | 354                    |
| Ratio referrals:children                                       | 1.65         | 1.70                   |
| Referrals made per child                                       | <b>N=206</b> | <b>N=208</b>           |
| 1                                                              | 159 (77.2%)  | 140 (67.3%)            |
| 2                                                              | 34 (16.5%)   | 51 (24.5%)             |
| 3 to 5                                                         | 13 (6.3%)    | 27 (8.2%)              |
| <b>Unit=referral (referred to CSCS encompass any referral)</b> | <b>n=339</b> | <b>n=354</b>           |
| Source of referral                                             |              |                        |
| Individual                                                     | 29 (8.8%)    | 34 (10.0%)             |
| School/Education                                               | 150 (45.7%)  | 136 (40.0%)            |
| Health services                                                | 114 (34.8%)  | 132 (38.8%)            |
| Local Authority Services                                       | 35 (10.7%)   | 38 (11.2%)             |
| Missing                                                        | 11           | 14                     |
| Primary need of referrals                                      |              |                        |
| Abuse or neglect                                               | 198 (58.9%)  | 205 (57.9%)            |
| Family dysfunction                                             | 72 (21.4%)   | 88 (24.9%)             |
| Family in acute stress                                         | 19 (5.7%)    | 21 (5.9%)              |
| Low income/absent parenting/ socially unacceptable behaviour   | 11 (3.3%)    | 7 (2.0%)               |
| Parental/Childs disability illness                             | 14 (4.2%)    | 11 (3.1%)              |
| Cases other than Child in Need                                 | 11 (2.3%)    | 12 (3.4%)              |
| Not stated                                                     | 11 (3.3%)    | 9 (2.5%)               |
| Missing                                                        | 3            | 1                      |
| Legal status of child looked after†                            | <b>N=17</b>  | <b>N=23</b>            |
| Interim care order                                             | 6 (35.3%)    | 8 (34.8%)              |
| Full care order                                                | 5 (29.4%)    | 6 (26.1%)              |

| Outcome                                                   | FNP               | Usual care (UC)  |
|-----------------------------------------------------------|-------------------|------------------|
| Placement order granted                                   | <5                | <5               |
| Single period of accommodation under section 20           | <5                | <5               |
| <b>Injuries and Ingestions:<br/>Admission to hospital</b> | <b>N=760</b>      | <b>N=759</b>     |
| N unique admissions                                       | 109               | 119              |
| Ratio admissions: children                                | 1.22              | 1.20             |
| Length of hospital stay (days)                            | 0.5‡ (0.5 to 1.0) | 0.5 (0.5 to 1.0) |
|                                                           | <b>N=760</b>      | <b>N=746</b>     |
| Death                                                     | <10               |                  |

Data are n (%), n/N (%), or median (25<sup>th</sup> to 75<sup>th</sup> centile) unless otherwise stated. <5 = numbers suppressed. FNP = Family Nurse Partnership Programme + Usual Care. \* A unique referral is counted as a distinct referral date per child. † Legal status for most recent CLA episode (Of n=52 children with a recent CLA episode, n=12 cases have a missing status). ‡ 0.5 days indicates an admission and discharge on the same day (could be up to 1 day in hospital). Source: National Pupil Database, The Department for Education

**Table S7 Emergency attendance to hospital by injury or ingestion, by trial arm**

| Injury / ingestion              | Trial arm, n (%) |                      |
|---------------------------------|------------------|----------------------|
|                                 | FNP (N = 911)    | Usual Care (N = 881) |
| Laceration                      | 136 (14.9)       | 158 (17.9)           |
| Contusion/abrasion              | 90 (9.9)         | 96 (10.9)            |
| Soft-tissue inflammation        | 63 (6.9)         | 64 (7.3)             |
| Head injury                     | 68 (29.4)        | 249 (28.3)           |
| Dislocation                     | 109 (12.0)       | 84 (9.5)             |
| Sprain/muscle/tendon injury     | 35 (3.8)         | 33 (3.8)             |
| Nerve/vascular injury           | 74 (8.1)         | 60 (6.8)             |
| Burns and scalds/electric shock | 48 (5.3)         | 37 (4.2)             |
| Foreign body                    | 40 (4.4)         | 6 (5.2)              |
| Bites and stings                | 12 (1.3)         | 20 (2.3)             |
| Poisoning                       | 36 (4.0)         | 34 (3.9)             |

**Table S8 Admissions by injury/ingestion type and trial arm: For children of all ages (0-6 years) and for children aged 0-2 years old**

| Diagnosis ICD-10 code                                                                                  | Trial arm, n (%) |                       |                          |                      |
|--------------------------------------------------------------------------------------------------------|------------------|-----------------------|--------------------------|----------------------|
|                                                                                                        | All children     |                       | Children aged 0-2 years* |                      |
|                                                                                                        | FNP<br>(n=109)   | Usual care<br>(n=119) | FNP<br>(n=42)            | Usual Care<br>(n=63) |
| S00–S09 Injuries to the head                                                                           | 52 (47.7)        | 61 (51.3)             | 39 (61.9)                | 27 (64.3)            |
| S20–S29 Injuries to the thorax                                                                         | 9 (8.3)          | 6 (5.0)               |                          |                      |
| S30–S39 Injuries to the abdomen, lower back, lumbar spine and pelvis                                   |                  |                       |                          |                      |
| S40–S49 Injuries to the shoulder and upper arm                                                         |                  |                       | 7 (16.7)                 | 7 (11.1)             |
| S50–S59 Injuries to the elbow and forearm                                                              |                  |                       |                          |                      |
| S60–S69 Injuries to the wrist and hand                                                                 | 8 (7.3)          | 5 (4.2)               |                          |                      |
| S70–S79 Injuries to the hip and thigh                                                                  | 11 (10.1)        | 11 (9.2)              |                          |                      |
| S80–S89 Injuries to the knee and lower leg                                                             |                  |                       |                          |                      |
| S90–S99 Injuries to the ankle and foot                                                                 |                  |                       |                          |                      |
| T00–T07 Injuries involving multiple body regions                                                       | 5 (4.6)          | 10 (8.4)              | 15 (35.7)                | 7 (11.1)             |
| T08–T14 Injuries to unspecified part of trunk, limb or body region                                     |                  |                       |                          |                      |
| T20–T32 Burns and corrosions                                                                           |                  |                       |                          |                      |
| T15–T19 Effects of foreign body entering through natural orifice                                       | 5 (4.6)          | 8 (6.7)               |                          |                      |
| T36–T50 Poisoning by drugs, medicaments and biological substances                                      | 11 (10.1)        | 8 (6.7)               |                          |                      |
| T51–T65 Toxic effects of substances chiefly non-medicinal as to source (sting, alcohol, solvents etc.) | 8 (7.3)          | 10 (8.4)              |                          |                      |
| T66–T78 Other and unspecified effects of external causes                                               |                  |                       |                          |                      |

\* We undertook further exploratory analyses of length of stay following admission for:

- (i) children aged under 1 year old: The median (25<sup>th</sup> to 75<sup>th</sup> quartile) length of stay (in days) was, for the n=20 children in FNP group 0.75 (0.5 to 2) and for the n=29 children in the UC group 0.5 (0.5 to 2) with no difference observed (Incidence rate ratio (IRR) 0.68, 95% CI 0.24 to 1.98, Ref = UC).
- (ii) children aged between 1 and under 2 years old: The median (25<sup>th</sup> to 75<sup>th</sup> centile) length of stay (in days) was, for the n=21 admissions in FNP group, 0.5 (0.5 to 1) and for the n=34 admissions in UC group 0.5 (0.5 to 1) with no observed difference (IRR 0.36, 95% CI 0.05 to 2.43, Ref = UC).

**Table S9. Hospital admissions for injuries and ingestions by trial arm and broken down by age categories**

|                                                                              | <b>FNP<br/>N=760</b> | <b>Usual care<br/>N=759</b> |
|------------------------------------------------------------------------------|----------------------|-----------------------------|
| No hospital admissions with an injury or an ingestion (0-6 years)            | 671 (88.3%)          | 660 (87.0%)                 |
| At least one hospital admission with an injury or an ingestion               | 89 (11.7%)           | 99 (13.0%)                  |
| By age at admission:                                                         |                      |                             |
| <b>Under 1 year</b>                                                          |                      |                             |
| Children with no admission n(%)                                              | 744 (97.9%)          | 732 (96.4%)                 |
| Children with at least one admission n(%)                                    | 16 (2.1%)            | 27 (3.6%)                   |
| 95% CI                                                                       | 1.3 to 3.3%          | 2.5 to 5.1%                 |
| Total number of admissions (different days)                                  | 20                   | 29                          |
| Ratio of admissions: child                                                   | 1.25                 | 1.08                        |
|                                                                              | n=20                 | n=29                        |
| Length of stay (days) Median (25 <sup>th</sup> to 75 <sup>th</sup> centiles) | 0.75 (0.5 to 2)      | 0.5 (0.5 to 2)              |
| Same day discharge (admission = discharge date)                              | 10 (50%)             | 15 (51.7%)                  |
| Discharge after 1 day or more                                                | 10 (50%)             | 14 (48.3%)                  |
| <b>1 to under 2 years</b>                                                    |                      |                             |
| Children with no admission n(%)                                              | 738 (97.1%)          | 725 (95.5%)                 |
| Children with at least one admission n(%)                                    | 21 (2.8%)            | 31 (4.1%)                   |
| 95% CI                                                                       | 1.8 to 4.2%          | 2.9 to 5.7%                 |
| Total number of admissions (different days)                                  | 22                   | 34                          |
| Ratio of admissions: child                                                   | 1.05                 | 1.10                        |
|                                                                              | n=21*                | n=34                        |
| Length of stay (days) Median (25 <sup>th</sup> to 75 <sup>th</sup> centiles) | 0.5 (0.5 to 1)       | 0.5 (0.5 to 1)              |
| Same day discharge (admission = discharge date)                              | 14 (66.7%)           | 23 (67.6%)                  |
| Discharge after 1 day or more                                                | 7 (33.3%)            | 11 (32.4%)                  |
| <b>25 months to under 6 years</b>                                            |                      |                             |
| Children with no admission n(%)                                              | 699 (92.0%)          | 709 (93.4%)                 |
| Children with at least one admission n(%)                                    | 61 (8.0%)            | 50 (6.6%)                   |
| 95% CI                                                                       | 6.3 to 10.2%         | 5.0 to 8.6%                 |
| Total number of admissions (different days)                                  | 67                   | 56                          |
| Ratio of admissions: child                                                   | 1.10                 | 1.12                        |
|                                                                              | n=65*                | n=56                        |
| Length of stay (days) Median (25 <sup>th</sup> to 75 <sup>th</sup> centiles) | 0.5 (0.5 to 1)       | 0.5 (0.5 to 1)              |
| Same day discharge (admission = discharge date)                              | 38 (58.4%)           | 29 (51.8%)                  |
| Discharge after 1 day                                                        | 18 (27.6%)           | 17 (30.4%)                  |
| Discharge after 2 days or more                                               | 11 (16.9%)           | 10 (17.9%)                  |

\* Date of discharge missing – LOS cannot be calculated

LOS=0.5 days indicates an admission and discharge on the same day (could be up to 1 day in hospital).

**Table S10 Child health, developmental and educational: descriptives**

| Outcome                                                                                     | FNP                 | Usual care          | Absolute risk difference (FNP-Usual care) (95% CI) |
|---------------------------------------------------------------------------------------------|---------------------|---------------------|----------------------------------------------------|
| <b>Early educational attendance</b>                                                         | <b>N=759</b>        | <b>N=747</b>        |                                                    |
| Children attending education* up to the age of 4 years                                      |                     |                     |                                                    |
| Yes†                                                                                        | 758 (99.7%)         | 747 (100.0%)        | -0.3% (-1.0 to 0.3%)                               |
| Children attending school up to the age of:                                                 |                     |                     |                                                    |
| • 4 years†                                                                                  | 753 (99.1%)         | 744 (99.6%)         | -0.5% (-1.5 to 0.4%)                               |
| • 3 years                                                                                   | 479 (63.0%)         | 482 (64.5%)         |                                                    |
| • 2 years                                                                                   | 137 (18.0%)         | 147 (19.7%)         |                                                    |
| Earliest type of day care                                                                   | <b>N=334</b>        | <b>N=308</b>        |                                                    |
| Private                                                                                     | 217 (65.0%)         | 221 (71.8%)         |                                                    |
| Voluntary                                                                                   | 52 (15.6%)          | 57 (18.5%)          |                                                    |
| Local Authority Day Nursery                                                                 | 36 (10.8%)          | 22 (7.1%)           |                                                    |
| Other‡                                                                                      | 29 (8.7%)           | 8 (2.6%)            |                                                    |
| <b>School attendance</b>                                                                    | <b>N=754</b>        | <b>N=740</b>        |                                                    |
| Number of academic sessions§                                                                | 630 (264 to 638)    | 630 (262 to 638)    |                                                    |
| Overall absence rate<br>Median (25 <sup>th</sup> to 75 <sup>th</sup> centiles)              | 5.08 (2.69 to 8.73) | 5.19 (2.73 to 8.41) |                                                    |
| Overall authorised absence rate<br>Median (25 <sup>th</sup> to 75 <sup>th</sup> centiles)   | 3.50 (1.96 to 6.09) | 3.79 (2.02 to 6.11) |                                                    |
| Overall unauthorised absence rate<br>Median (25 <sup>th</sup> to 75 <sup>th</sup> centiles) | 1.84 (0.76 to 4.34) | 1.57 (0.63 to 3.88) |                                                    |
| <b>Early Years assessment</b>                                                               | <b>N=743</b>        | <b>N=728</b>        |                                                    |
| Achieving good level of development (GLD) ‖:                                                |                     |                     |                                                    |
| • Communication and Language                                                                | 642 (86.4%)         | 613 (84.2%)         | 2.2% (-1.4 to 5.8%)                                |
| • Physical Development                                                                      | 676 (91.0%)         | 643 (88.3%)         | 2.7% (-0.5 to 5.8%)                                |

| Outcome                                      | FNP          | Usual care   | Absolute risk difference (FNP-Usual care) (95% CI) |
|----------------------------------------------|--------------|--------------|----------------------------------------------------|
| • Personal, Social and Emotional Development | 668 (89.9%)  | 634 (87.1%)  | 2.8% (-0.4 to 6.1%)                                |
| • Literacy                                   | 493 (66.4%)  | 458 (62.9%)  | 3.4% (-1.4 to 8.3%)                                |
| • Maths                                      | 545 (73.4%)  | 516 (70.9%)  | 2.5% (-2.1 to 7.0%)                                |
| Total point score¶                           |              |              |                                                    |
| • Score <34                                  | 325 (43.8%)  | 345 (47.4%)  |                                                    |
| • Score = 34                                 | 187 (25.2%)  | 183 (25.1%)  |                                                    |
| • Score >34                                  | 231 (31.1%)  | 200 (27.5%)  |                                                    |
| <b>Key Stage 1 assessments</b>               |              |              |                                                    |
| Writing academic year 2017/18                | <b>N=242</b> | <b>N=245</b> |                                                    |
| Lower than expected                          | 82 (33.9%)   | 81 (33.1%)   |                                                    |
| Reaching at least the expected standard**    | 160 (66.1%)  | 164 (66.9%)  | -0.8 (-9.2 to 7.5)                                 |
| Expected standard                            | 140 (57.9%)  | 132 (53.9%)  | 4.0 (-4.8 to 12.7)                                 |
| Higher standard                              | 20 (8.3%)    | 32 (13.1%)   | -4.8 (-10.4 to 0.7)                                |

Data are n (%), n/N (%), or median (25<sup>th</sup> to 75<sup>th</sup> centile) unless otherwise stated. FNP = Family Nurse Partnership Programme + Usual Care.

\* School or an Ofsted registered Private, Voluntary or Independent (PVI) establishment;

† = Not estimable; ‡ Childminding Network, Childminder, Registered Independent School, Other; § Total number of sessions over the academic years available (2013 to Spring 2017) and all 6 terms per academic year. ¶ Children achieving a good level of development are those achieving at least the expected level within the prime and specific areas of learning; ¶¶ Total point score ranges from 17 to 51 with a higher score indicating a better level of development. \*\*

Working at the expected standard and at a greater depth within the expected standard. PLASC (Autumn, Spring and Summer terms), AP, PRU Census, and EYC. If for any of the years no response was recorded then the assumption was that the child was not included in the denominator as either not present on Census day or not in school. Source: National Pupil Database, The Department for Education

**Table S11 Children reaching the expected standard in KS1 assessments by trial arm and academic year**

|         |            | Academic year<br>2016/17 | Academic year<br>2017/18 |
|---------|------------|--------------------------|--------------------------|
| Reading | FNP        | 302/498 (60.6%)          | 181/242 (74.8%)          |
|         | Usual care | 263/487 (54.0%)          | 180/245 (73.5%)          |
| Maths   | FNP        | 280/498 (56.2%)          | 179/242 (74.0%)          |
|         | Usual care | 263/487 (54.0%)          | 186/245 (75.9%)          |
| Science | FNP        | 341/498 (68.5%)          | 196/242 (81.0%)          |
|         | Usual care | 310/487 (63.7%)          | 203/245 (82.9%)          |

Source: National Pupil Database, The Department for Education

**Figure S1 Distribution of children's month of birth by trial arm**

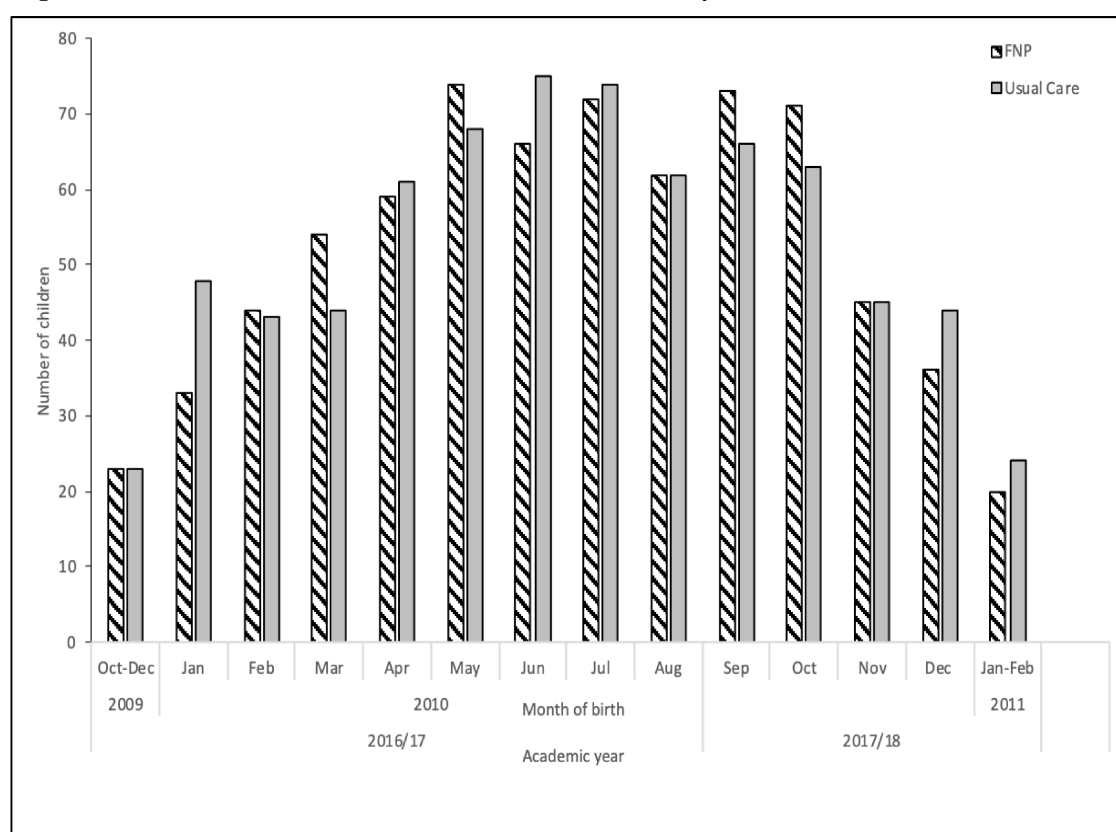



**Table S12 Comparison of parameter estimates before and after adjustment for child's month<sup>a</sup> of birth**

|                                                          | Odds ratio <sup>b</sup> (95% CI), p-values                |                                                                           |
|----------------------------------------------------------|-----------------------------------------------------------|---------------------------------------------------------------------------|
|                                                          | Adjusted for site and minimisation variables <sup>c</sup> | Adjusted for site, minimisation variables <sup>c</sup> and month of birth |
| <b>Key Stage 1 outcome</b>                               |                                                           |                                                                           |
| <b>Reading</b>                                           |                                                           |                                                                           |
| Reaching at least the expected standard                  | 1.23 (0.99 to 1.53), 0.051                                | 1.26 (1.02 to 1.57), 0.035                                                |
| <i>Expected standard</i>                                 | <i>1.24 (0.99 to 1.56), 0.056</i>                         | <i>1.27 (1.01 to 1.59), 0.042</i>                                         |
| <i>Higher standard</i>                                   | <i>1.20 (0.88 to 1.65), 0.250</i>                         | <i>1.26 (0.91 to 1.75), 0.161</i>                                         |
| <b>Maths</b>                                             |                                                           |                                                                           |
| Reaching at least the expected standard                  | 1.04 (0.84 to 1.28), 0.731                                | 1.06 (0.85 to 1.31), 0.613                                                |
| <i>Expected standard</i>                                 | <i>1.06 (0.85 to 1.32), 0.611</i>                         | <i>1.07 (0.86 to 1.34), 0.527</i>                                         |
| <i>Higher standard</i>                                   | <i>0.93 (0.64 to 1.35), 0.711</i>                         | <i>0.93 (0.74 to 1.17), 0.522</i>                                         |
| <b>Science</b>                                           |                                                           |                                                                           |
| Reaching at least the expected standard                  | 1.14 (0.91 to 1.43), 0.254                                | 1.16 (0.92 to 1.47), 0.197                                                |
| <b>Writing academic year 2017/18</b>                     |                                                           |                                                                           |
| Reaching at least the expected standard                  | 1.24 (0.97 to 1.60), 0.090                                | 1.26 (0.98 to 1.62), 0.076                                                |
| <i>Expected standard</i>                                 | <i>1.29 (1.00 to 1.68), 0.054</i>                         | <i>1.30 (1.00 to 1.69), 0.050</i>                                         |
| <i>Higher standard</i>                                   | <i>0.92 (0.51 to 1.64), 0.769</i>                         | <i>0.97 (0.54 to 1.75), 0.917</i>                                         |
| <b>Early Years Assessment</b>                            |                                                           |                                                                           |
| Achieving GLD in all five areas of learning <sup>d</sup> | 1.26 (1.03 to 1.55), 0.026                                | 1.31 (1.05 to 1.62), 0.015                                                |
| Achieving GLD in all 17 early learning goals             | 1.24 (1.01 to 1.52), 0.043                                | 1.27 (1.03 to 1.58), 0.027                                                |
| Total point score                                        | 0.65 (-0.11 to 1.41), 0.094                               | 0.70 (-0.03 to 1.42), 0.060                                               |

*a* Quarter of birth runs from September to November, December to February, March to May, June to August; *b* Odds ratio represents the FNP arm compared to Usual care; *c* gestational age, smoking status at recruitment, and first or preferred language; *d* Children achieving a good level of development (GLD) are those achieving at least the expected level within the prime and specific areas of learning.

Source: National Pupil Database, The Department for Education

## VII. Results of planned sub-group analysis

No differential effects due to maternal age, deprivation, participation in employment, education or training, or basic life skills were found in planned sub-group analyses for any of the objective maltreatment outcomes (Table S10 and Table S11). The beneficial impact of FNP on EYFSP total point score was mostly observed for children with mothers aged <16 years rather than those aged  $\geq 16$  at study entry but no other differences by study sub-group were found (Table S12).

The differential effects due to maternal age, deprivation, participation in employment, education or training, or basic life skills for KS1 reading, maths and science are displayed in Tables S13a to e and for writing in Table S14. At KS1, sex differences were large with girls outperforming boys in all four subject areas (Table S13a). The intervention effect was greater for boys than girls with a higher proportion reaching the expected standard in the FNP arm, particularly for reading and writing (and strengthened after adjusting for month of birth) and for the writing assessment (academic year 2016/17) this interaction reached statistical significance after adjusting for month of birth (post-hoc analysis). When examining how the intervention effects differed in mothers aged less than 16 years at recruitment compared to mothers aged 16 years or more in each KS1 assessment, differences were observed in maths (Table S13b) and writing (Table S14), with a larger effect seen in mothers aged less than 16 at recruitment, when compared to those aged 16 or more.

**Table S13 Subgroup analyses for referrals to Children's social care services**

| N(%) referred                      | FNP        | Usual care | Adjusted <sup>a</sup> OR (95% CI),<br>p-value | Interaction<br>p-value |
|------------------------------------|------------|------------|-----------------------------------------------|------------------------|
| <b>Child Gender</b>                |            |            |                                               |                        |
| Boys                               | 99 (26.3)  | 108 (27.7) | 0.93 (0.65 to 1.33), 0.69                     | 0.78                   |
| Girls                              | 107 (27.9) | 100 (28.1) | 1.01 (0.69 to 1.48), 0.94                     |                        |
| <b>Maternal age at recruitment</b> |            |            |                                               |                        |
| <16 years                          | 17 (34.7)  | 19 (34.6)  | 1.05 (0.44 to 2.46), 0.92                     | 0.96                   |
| $\geq 16$ years                    | 189 (26.6) | 189 (27.4) | 0.96 (0.72 to 1.30), 0.81                     |                        |
| <b>Adaptive functioning</b>        |            |            |                                               |                        |
| No difficulty                      | 140 (25.4) | 149 (26.3) | 0.99 (0.71 to 1.38), 0.96                     | 0.67                   |
| Difficulty in basic skills         | 66 (31.7)  | 59 (33.0)  | 0.81 (0.59 to 1.41), 0.67                     |                        |
| <b>NEET status</b>                 |            |            |                                               |                        |
| EET                                | 70 (20.3)  | 75 (23.1)  | 0.83 (0.54 to 1.29), 0.42                     | 0.18                   |
| NEET                               | 100 (32.5) | 89 (29.2)  | 1.19 (0.80 to 1.78), 0.39                     |                        |
| <b>Deprivation quintile</b>        |            |            |                                               |                        |

|                       |           |           |                           |      |
|-----------------------|-----------|-----------|---------------------------|------|
| 1 – least deprivation | 33 (20.4) | 34 (23.9) | 0.77 (0.44 to 1.36), 0.37 | 0.32 |
| 2                     | 36 (23.8) | 30 (20.5) | 1.26 (0.61 to 2.60), 0.53 |      |
| 3                     | 42 (28.8) | 43 (27.9) | 0.96 (0.50 to 1.86), 0.91 |      |
| 4                     | 41 (31.1) | 39 (25.3) | 1.27 (0.69 to 2.31), 0.44 |      |
| 5 – most deprivation  | 54 (33.3) | 61 (42.4) | 0.65 (0.35 to 1.22), 0.18 |      |

<sup>a</sup> FNP compared to usual care. Analysis adjusted for stratification (site), minimisation variables (gestational age, smoking status at recruitment, and first or preferred language). N/EET – Not/In Education, Employment or Training (Source: National Pupil Database, The Department for Education)

**Table S14 Subgroup analyses for child in need status**

| N(%) CIN                           | FNP        | Usual care | Adjusted <sup>a</sup> OR (95% CI), p-value | Interaction p-value |
|------------------------------------|------------|------------|--------------------------------------------|---------------------|
| <b>Gender</b>                      |            |            |                                            |                     |
| Boys                               | 80 (21.3)  | 80 (20.5)  | 1.05 (0.72 to 1.53), 0.81                  | 0.56                |
| Girls                              | 81 (21.1)  | 82 (23.0)  | 0.91 (0.60 to 1.38), 0.65                  |                     |
| <b>Maternal age at recruitment</b> |            |            |                                            |                     |
| <16 years                          | 14 (28.6)  | 16 (29.1)  | 1.00 (0.41 to 2.43), 0.99                  | 0.98                |
| ≥16 years                          | 147 (20.7) | 146 (21.1) | 0.98 (0.72 to 1.33), 0.88                  |                     |
| <b>Adaptive functioning</b>        |            |            |                                            |                     |
| No difficulty                      | 106 (19.2) | 113 (20.0) | 0.99 (0.70 to 1.42), 0.98                  | 0.76                |
| Difficulty in basic skills         | 55 (26.4)  | 49 (27.4)  | 0.93 (0.59 to 1.47), 0.76                  |                     |
| <b>NEET</b>                        |            |            |                                            |                     |
| EET                                | 52 (16.0)  | 52 (15.1)  | 0.93 (0.57 to 1.53), 0.78                  | 0.42                |
| NEET                               | 81 (26.3)  | 72 (23.6)  | 1.18 (0.77 to 1.77), 0.46                  |                     |
| <b>Deprivation quintile</b>        |            |            |                                            |                     |
| 1 – least deprivation              | 24 (14.8)  | 22 (15.5)  | 0.92 (0.49 to 1.73), 0.79                  | 0.62                |
| 2                                  | 30 (19.9)  | 22 (15.1)  | 1.53 (0.68 to 3.47), 0.31                  |                     |
| 3                                  | 32 (21.9)  | 36 (23.4)  | 0.89 (0.52 to 1.54), 0.68                  |                     |
| 4                                  | 32 (24.2)  | 34 (22.1)  | 1.15 (0.64 to 2.06), 0.64                  |                     |
| 5 – most deprivation               | 43 (26.5)  | 48 (33.3)  | 0.72 (0.38 to 1.38), 0.32                  |                     |

<sup>a</sup> FNP compared to usual care. Analysis adjusted for stratification (site), minimisation variables (gestational age, smoking status at recruitment, and first or preferred language). N/EET – Not/In Education, Employment or Training (Source: National Pupil Database, The Department for Education).

**Table S15 Subgroup analyses for Early Years Assessment total point score**

| Mean (SD) total point score                    | FNP                    | Usual care             | Adjusted <sup>a</sup> mean difference (95% CI), p-value | Interaction p-value |
|------------------------------------------------|------------------------|------------------------|---------------------------------------------------------|---------------------|
| <b>Gender</b>                                  |                        |                        |                                                         |                     |
| Boys                                           | N=369<br>30.57 (7.33)  | N=383<br>29.84 (7.56)  | 0.75 (-0.31 to 1.82), 0.17                              | 0.57                |
| Girls                                          | N=374<br>33.85 (6.79)  | N=345<br>33.53 (7.22)  | 0.34 (-0.67 to 1.35), 0.51                              |                     |
| <b>Maternal age at recruitment</b>             |                        |                        |                                                         |                     |
| <16 years                                      | N=45<br>32.44 (6.71)   | N=52<br>28.91 (7.70)   | 3.65 (0.76 to 6.55), 0.013                              | 0.046               |
| ≥16 years                                      | N= 698<br>32.21 (7.28) | N= 676<br>31.80 (7.58) | 0.42 (-0.36 to 1.21), 0.29                              |                     |
| <b>Adaptive functioning</b>                    |                        |                        |                                                         |                     |
| No difficulty                                  | N=540<br>32.99 (7.12)  | N=552<br>32.11 (7.65)  | 0.88 (0.003 to 1.75), 0.049                             | 0.50                |
| Difficulty in basic skills                     | N=203<br>30.18 (7.20)  | N=175<br>29.94 (7.33)  | 0.34 (-1.11 to 1.79), 0.65                              |                     |
| <b>NEET status</b>                             |                        |                        |                                                         |                     |
| In EET                                         | N=339<br>32.45 (7.12)  | N=322<br>32.37 (7.68)  | 0.15 (-0.99 to 1.28), 0.80                              | 0.95                |
| NEET                                           | N= 304<br>31.72 (7.57) | N=299<br>31.50 (7.43)  | 0.19 (-1.00 to 1.38), 0.76                              |                     |
| <b>Index of Multiple Deprivation quintiles</b> |                        |                        |                                                         |                     |
| 1 = least deprived                             | N=159<br>33.16 (7.44)  | N=139<br>31.53 (8.24)  | 1.72 (-0.07 to 3.50), 0.060                             | ref                 |
| 2                                              | N=148<br>32.16 (6.97)  | N=144<br>31.59 (7.05)  | 0.65 (-0.96 to 2.27), 0.43                              | 0.84                |
| 3                                              | N=146<br>32.16 (6.79)  | N=151<br>32.59 (7.27)  | -0.20 (-1.79 to 1.39), 0.80                             | 0.21                |
| 4                                              | N=128<br>30.95 (7.53)  | N=148<br>31.11 (7.50)  | -0.31 (-2.11 to 1.48), 0.73                             | 0.85                |
| 5 = most deprived                              | N=156<br>32.41 (7.46)  | N=140<br>31.03 (8.12)  | 1.45 (-0.33 to 3.22), 0.11                              | 0.74                |

<sup>a</sup> FNP compared to usual care. Analysis adjusted for stratification (site), minimisation variables (gestational age, smoking status at recruitment, and first or preferred language). N/EET – Not/In Education, Employment or Training (Source: National Pupil Database, The Department for Education).

**Table S16 Subgroup analyses for KS1 assessments reaching the expected standard (RES)****(a) Gender**

| N(%)                                       | Boys                      |            | Girls                     |            |
|--------------------------------------------|---------------------------|------------|---------------------------|------------|
|                                            | Not RES                   | RES        | Not RES                   | RES        |
| <b>Reading</b>                             |                           |            |                           |            |
| FNP                                        | 152 (41.8)                | 212 (58.2) | 105 (27.9)                | 271 (72.1) |
| Usual care                                 | 182 (47.3)                | 203 (52.7) | 107 (30.8)                | 240 (69.2) |
| Adjusted <sup>a</sup> OR (95% CI), p-value | 1.27 (0.95 to 1.69), 0.11 |            | 1.16 (0.84 to 1.59), 0.38 |            |
| <i>Interaction p-value=0.68</i>            |                           |            |                           |            |

|                                            |                           |            |                            |            |
|--------------------------------------------|---------------------------|------------|----------------------------|------------|
| Adjusted <sup>b</sup> OR (95% CI), p-value | 1.30 (0.96 to 1.75), 0.09 |            | 1.17 (0.84 to 1.62), 0.36  |            |
| <i>Interaction p-value=0.68</i>            |                           |            |                            |            |
| <b>Maths</b>                               |                           |            |                            |            |
| FNP                                        | 149 (40.9)                | 215 (59.1) | 132 (35.1)                 | 244 (64.9) |
| Usual care                                 | 166 (43.1)                | 219 (56.9) | 117 (33.7)                 | 230 (66.3) |
| Adjusted <sup>a</sup> OR (95% CI), p-value | 1.11 (0.83 to 1.49), 0.49 |            | 0.95 (0.69 to 1.29), 0.72* |            |
| <i>Interaction p-value=0.46</i>            |                           |            |                            |            |
| Adjusted <sup>b</sup> OR (95% CI), p-value | 1.14 (0.84 to 1.54), 0.40 |            | 0.94 (0.69 to 1.29), 0.71  |            |
| <i>Interaction p-value=0.47</i>            |                           |            |                            |            |
| <b>Science</b>                             |                           |            |                            |            |
| FNP                                        | 120 (33.0)                | 244 (67.0) | 83 (22.1)                  | 293 (77.9) |
| Usual care                                 | 138 (35.8)                | 247 (64.2) | 81 (23.3)                  | 266 (76.7) |
| Adjusted <sup>a</sup> OR (95% CI), p-value | 1.16 (0.86 to 1.58), 0.34 |            | 1.08 (0.76 to 1.53), 0.68  |            |
| <i>Interaction p-value=0.77</i>            |                           |            |                            |            |
| Adjusted <sup>b</sup> OR (95% CI), p-value | 1.18 (0.87 to 1.63), 0.28 |            | 1.08 (0.76 to 1.55), 0.66  |            |
| <i>Interaction p-value=0.72</i>            |                           |            |                            |            |

RES = Reaching the expected standard; <sup>a</sup> Analysis adjusted for stratification (site), minimisation variables (gestational age, smoking status at recruitment, and first or preferred language); <sup>b</sup> Analysis adjusted for stratification (site), minimisation variables (gestational age, smoking status at recruitment, and first or preferred language) and month of birth. (Source: National Pupil Database, The Department for Education).

#### (b) Maternal age at recruitment

| N(%)                                       | Maternal age <16 years     |           | Maternal age ≥16 years    |            |
|--------------------------------------------|----------------------------|-----------|---------------------------|------------|
|                                            | Not RES                    | RES       | Not RES                   | RES        |
| <b>Reading</b>                             |                            |           |                           |            |
| FNP                                        | 21 (44.7)                  | 26 (55.3) | 236 (34.1)                | 457 (65.9) |
| Usual care                                 | 29 (52.7)                  | 26 (47.3) | 260 (38.4)                | 417 (61.6) |
| Adjusted <sup>a</sup> OR (95% CI), p-value | 1.21 (0.97 to 1.52), 0.09  |           | 1.49 (0.65 to 3.41), 0.34 |            |
| <i>Interaction p-value=p=0.66</i>          |                            |           |                           |            |
| Adjusted <sup>b</sup> OR (95% CI), p-value | 1.50 (0.65 to 3.48), 0.34  |           | 1.25 (0.99 to 1.57), 0.07 |            |
| <i>Interaction p-value=0.62</i>            |                            |           |                           |            |
| <b>Maths</b>                               |                            |           |                           |            |
| FNP                                        | 16 (34.0)                  | 31 (66.0) | 265 (38.2)                | 428 (61.8) |
| Usual care                                 | 32 (58.2)                  | 23 (41.8) | 251 (37.1)                | 426 (62.9) |
| Adjusted <sup>a</sup> OR (95% CI), p-value | 3.15 (0.94 to 10.48), 0.06 |           | 0.96 (0.77 to 1.19), 0.69 |            |
| <i>Interaction p-value=0.011</i>           |                            |           |                           |            |

|                                            |                            |           |                           |            |
|--------------------------------------------|----------------------------|-----------|---------------------------|------------|
| Adjusted <sup>b</sup> OR (95% CI), p-value | 3.23 (1.36 to 7.67), 0.008 |           | 0.98 (0.78 to 1.22), 0.83 |            |
| <i>Interaction p-value=0.014</i>           |                            |           |                           |            |
| <b>Science</b>                             |                            |           |                           |            |
| FNP                                        | 18 (38.3)                  | 29 (61.7) | 185 (26.7)                | 508 (73.3) |
| Usual care                                 | 25 (45.4)                  | 30 (54.6) | 194 (28.7)                | 483 (71.3) |
| Adjusted <sup>a</sup> OR (95% CI), p-value | 1.54 (0.53 to 4.47), 0.42  |           | 1.11 (0.88 to 1.41), 0.39 |            |
| <i>Interaction p-value=0.56</i>            |                            |           |                           |            |
| Adjusted <sup>b</sup> OR (95% CI), p-value | 1.37 (0.59 to 3.19), 0.467 |           | 1.14 (0.89 to 1.45), 0.29 |            |
| <i>Interaction p-value=0.69</i>            |                            |           |                           |            |

RES = Reaching the expected standard; <sup>a</sup> FNP compared to Usual care. Analysis adjusted for stratification (site), minimisation variables (gestational age, smoking status at recruitment, and first or preferred language); <sup>b</sup> Analysis adjusted for stratification (site), minimisation variables (gestational age, smoking status at recruitment, and first or preferred language) and month of birth. (Source: National Pupil Database, The Department for Education).

### (c) Adaptive functioning

| N(%)                                       | No difficulty with basic skills |            | Difficulty with basic skills |            |
|--------------------------------------------|---------------------------------|------------|------------------------------|------------|
|                                            | Not RES                         | RES        | Not RES                      | RES        |
| <b>Reading</b>                             |                                 |            |                              |            |
| FNP                                        | 152 (30.5)                      | 347 (69.5) | 87 (42.9)                    | 116 (57.1) |
| Usual care                                 | 188 (36.2)                      | 332 (63.8) | 84 (48.0)                    | 91 (52.0)  |
| Adjusted <sup>a</sup> OR (95% CI), p-value | 1.29 (0.98 to 1.70), 0.07       |            | 1.23 (0.82 to 1.86), 0.32    |            |
| <i>Interaction p-value=0.61</i>            |                                 |            |                              |            |
| Adjusted <sup>b</sup> OR (95% CI), p-value | 1.29 (0.98 to 1.69), 0.07       |            | 1.25 (0.83 to 1.91), 0.29    |            |
| <i>Interaction p-value=0.95</i>            |                                 |            |                              |            |
| <b>Maths</b>                               |                                 |            |                              |            |
| FNP                                        | 186 (34.6)                      | 351 (65.4) | 95 (46.8)                    | 108 (53.2) |
| Usual care                                 | 192 (34.5)                      | 364 (65.5) | 91 (52.0)                    | 84 (48.0)  |
| Adjusted <sup>a</sup> OR (95% CI), p-value | 1.01 (0.78 to 1.29), 0.97       |            | 1.27 (0.84 to 1.93), 0.26    |            |
| <i>Interaction p-value=0.38</i>            |                                 |            |                              |            |
| Adjusted <sup>b</sup> OR (95% CI), p-value | 1.01 (0.78 to 1.31), 0.93       |            | 1.32 (0.86 to 2.03), 0.20    |            |
| <i>Interaction p-value=0.28</i>            |                                 |            |                              |            |
| <b>Science</b>                             |                                 |            |                              |            |
| FNP                                        | 130 (24.2)                      | 407 (75.8) | 73 (36.0)                    | 130 (64.0) |
| Usual care                                 | 153 (27.5)                      | 403 (72.5) | 66 (37.7)                    | 109 (62.3) |
| Adjusted <sup>a</sup> OR (95% CI), p-value | 1.20 (0.92 to 1.58), 0.19       |            | 1.10 (0.71 to 1.69), 0.68    |            |
| <i>Interaction p-value=0.71</i>            |                                 |            |                              |            |

|                                            |                           |                           |
|--------------------------------------------|---------------------------|---------------------------|
| Adjusted <sup>b</sup> OR (95% CI), p-value | 1.22 (0.93 to 1.62), 0.16 | 1.13 (0.73 to 1.74), 0.59 |
| <i>Interaction p-value=0.82</i>            |                           |                           |

RES = Reaching the expected standard; <sup>a</sup> FNP compared to Usual care. Analysis adjusted for stratification (site), minimisation variables (gestational age, smoking status at recruitment, and first or preferred language); <sup>b</sup> Analysis adjusted for stratification (site), minimisation variables (gestational age, smoking status at recruitment, and first or preferred language) and month of birth. (Source: National Pupil Database, The Department for Education).

**(d) Not in Education, employment or training (NEET) status**

| N(%)                                       | NEET                      |            | In EET                    |            |
|--------------------------------------------|---------------------------|------------|---------------------------|------------|
|                                            | Not RES                   | RES        | Not RES                   | RES        |
| <b>Reading</b>                             |                           |            |                           |            |
| FNP                                        | 105 (31.2)                | 232 (68.8) | 109 (36.0)                | 194 (64.0) |
| Usual care                                 | 115 (35.8)                | 206 (61.2) | 121 (40.5)                | 178 (59.5) |
| Adjusted <sup>a</sup> OR (95% CI), p-value | 1.26 (0.91 to 1.75), 0.17 |            | 1.21 (0.87 to 1.69), 0.26 |            |
| <i>Interaction p-value=0.86</i>            |                           |            |                           |            |
| Adjusted <sup>b</sup> OR (95% CI), p-value | 1.31 (0.94 to 1.83), 0.17 |            | 1.25 (0.89 to 1.76), 0.19 |            |
| <i>Interaction p-value=0.83</i>            |                           |            |                           |            |
| <b>Maths</b>                               |                           |            |                           |            |
| FNP                                        | 122 (36.2)                | 215 (63.8) | 122 (40.3)                | 181 (59.7) |
| Usual care                                 | 107 (33.3)                | 214 (66.7) | 120 (40.1)                | 179 (59.9) |
| Adjusted <sup>a</sup> OR (95% CI), p-value | 0.89 (0.65 to 1.23), 0.48 |            | 0.99 (0.72 to 1.38), 0.97 |            |
| <i>Interaction p-value=0.64</i>            |                           |            |                           |            |
| Adjusted <sup>b</sup> OR (95% CI), p-value | 0.93 (0.66 to 1.29), 0.65 |            | 1.03 (0.73 to 1.42), 0.90 |            |
| <i>Interaction p-value=0.68</i>            |                           |            |                           |            |
| <b>Science</b>                             |                           |            |                           |            |
| FNP                                        | 87 (25.8)                 | 250 (74.2) | 821 (27.1)                | 221 (72.9) |
| Usual care                                 | 78 (24.3)                 | 243 (75.7) | 98 (32.8)                 | 201 (67.2) |
| Adjusted <sup>a</sup> OR (95% CI), p-value | 0.93 (0.65 to 1.33), 0.69 |            | 1.31 (0.92 to 1.87), 0.14 |            |
| <i>Interaction p-value=0.20</i>            |                           |            |                           |            |
| Adjusted <sup>b</sup> OR (95% CI), p-value | 0.96 (0.67 to 1.39), 0.84 |            | 1.36 (0.95 to 1.95), 0.10 |            |
| <i>Interaction p-value=0.22</i>            |                           |            |                           |            |

RES = Reaching the expected standard; <sup>a</sup> FNP compared to Usual care. Analysis adjusted for stratification (site), minimisation variables (gestational age, smoking status at recruitment, and first or preferred language); <sup>b</sup> Analysis adjusted for stratification (site), minimisation variables (gestational age, smoking status at recruitment, and first or preferred language) and month of birth. N/EET – Not/In Education, Employment or Training (Source: National Pupil Database, The Department for Education).

## (e) Index of Multiple Deprivation quintiles

|                                 | N(%)                                       | Q1=least deprived         |               | Q2                        |           | Q3                        |            | Q4                        |           | Q5=most deprived          |           |
|---------------------------------|--------------------------------------------|---------------------------|---------------|---------------------------|-----------|---------------------------|------------|---------------------------|-----------|---------------------------|-----------|
|                                 |                                            | Not RES                   | RES           | Not RES                   | RES       | Not RES                   | RES        | Not RES                   | RES       | Not RES                   | RES       |
| Reading                         | FNP                                        | 49 (30.3)                 | 113<br>(67.7) | 53 (36.3)                 | 93 (63.7) | 49 (33.6)                 | 97 (66.4)  | 48 (37.2)                 | 81 (62.8) | 57 (37.8)                 | 94 (62.2) |
|                                 | Usual care                                 | 54 (38.9)                 | 85<br>(61.1)  | 64 (44.1)                 | 81 (55.9) | 48 (31.8)                 | 103 (68.2) | 64 (43.0)                 | 85 (57.0) | 56 (39.4)                 | 86 (60.6) |
|                                 | Adjusted <sup>a</sup> OR (95% CI), p-value | 1.57 (0.88 to 2.77), 0.12 |               | 1.42 (0.88 to 2.29), 0.16 |           | 0.96 (0.59 to 1.57), 0.88 |            | 1.33 (0.81 to 2.18), 0.25 |           | 1.07 (0.60 to 1.89), 0.83 |           |
|                                 | Adjusted <sup>b</sup> OR (95% CI), p-value | 1.75 (1.00 to 3.07), 0.05 |               | 1.42 (0.85 to 2.37), 0.18 |           | 0.89 (0.53 to 1.48), 0.64 |            | 1.41 (0.86 to 2.34), 0.18 |           | 1.00 (0.57 to 1.75), 0.99 |           |
|                                 | <i>Interaction p-value=0.70</i>            |                           |               |                           |           |                           |            |                           |           |                           |           |
| <i>Interaction p-value=0.37</i> |                                            |                           |               |                           |           |                           |            |                           |           |                           |           |
| Maths                           | FNP                                        | 56 (34.6)                 | 106<br>(65.4) | 57 (39.0)                 | 89 (61.0) | 50 (34.3)                 | 96 (65.7)  | 55 (42.6)                 | 74 (57.4) | 62 (41.1)                 | 89 (58.9) |
|                                 | Usual care                                 | 52 (37.4)                 | 87<br>(62.6)  | 60 (41.4)                 | 85 (58.6) | 56 (37.1)                 | 95 (62.9)  | 60 (40.3)                 | 89 (59.7) | 54 (38.0)                 | 88 (62.0) |
|                                 | Adjusted <sup>a</sup> OR (95% CI), p-value | 1.15 (0.72 to 1.85), 0.56 |               | 1.12 (0.69 to 1.82), 0.65 |           | 1.17 (0.69 to 1.97), 0.56 |            | 0.93 (0.57 to 1.52), 0.77 |           | 0.91 (0.56 to 1.47), 0.69 |           |
|                                 | Adjusted <sup>b</sup> OR (95% CI), p-value | 1.36 (0.82 to 2.24), 0.23 |               | 1.12 (0.68 to 1.82), 0.66 |           | 1.11 (0.65 to 1.90), 0.69 |            | 0.98 (0.60 to 1.62), 0.95 |           | 0.88 (0.54 to 1.44), 0.62 |           |
|                                 | <i>Interaction p-value=0.91</i>            |                           |               |                           |           |                           |            |                           |           |                           |           |
| <i>Interaction p-value=0.81</i> |                                            |                           |               |                           |           |                           |            |                           |           |                           |           |



|                                 | N(%)                                          | Q1=least deprived             |               | Q2                        |            | Q3                        |            | Q4                        |            | Q5=most deprived          |            |
|---------------------------------|-----------------------------------------------|-------------------------------|---------------|---------------------------|------------|---------------------------|------------|---------------------------|------------|---------------------------|------------|
|                                 |                                               | Not RES                       | RES           | Not RES                   | RES        | Not RES                   | RES        | Not RES                   | RES        | Not RES                   | RES        |
| Science                         | FNP                                           | 37 (22.8)                     | 125<br>(77.2) | 36 (24.7)                 | 110 (75.3) | 40 (27.4)                 | 106 (72.6) | 45 (34.9)                 | 84 (65.1)  | 44 (29.1)                 | 107 (70.9) |
|                                 | Usual care                                    | 45 (32.4)                     | 94<br>(67.6)  | 45 (31.0)                 | 100 (69.0) | 35 (23.2)                 | 116 (76.8) | 47 (31.5)                 | 102 (68.5) | 46 (32.4)                 | 96 (67.6)  |
|                                 | Adjusted <sup>a</sup> OR (95%<br>CI), p-value | 1.68 (1.00 to 2.81),<br>0.048 |               | 1.39 (0.80 to 2.41), 0.25 |            | 0.82 (0.46 to 1.47), 0.51 |            | 0.89 (0.52 to 1.51), 0.65 |            | 1.24 (0.74 to 2.06), 0.42 |            |
|                                 | Adjusted <sup>b</sup> OR (95%<br>CI), p-value | 1.94 (1.13 to 3.30),<br>0.015 |               | 1.40 (0.76 to 2.57), 0.28 |            | 0.78 (0.43 to 1.40), 0.41 |            | 0.92 (0.55 to 1.55), 0.76 |            | 1.16 (0.69 to 1.96), 0.57 |            |
|                                 | <i>Interaction p-value=0.25</i>               |                               |               |                           |            |                           |            |                           |            |                           |            |
| <i>Interaction p-value=0.11</i> |                                               |                               |               |                           |            |                           |            |                           |            |                           |            |

RES = Reaching the expected standard; a FNP compared to Usual care; <sup>a</sup> Analysis adjusted for stratification (site), minimisation variables (gestational age, smoking status at recruitment, and first or preferred language); <sup>b</sup> Analysis adjusted for stratification (site), minimisation variables (gestational age, smoking status at recruitment, and first or preferred language) and month of birth. (Source: National Pupil Database, The Department for Education).

**Table S17 Subgroup analyses for reaching the expected standard in the writing KS1 assessment for 2016/17 academic year**

| N(%)                               | FNP        | Usual care | Adjusted <sup>a</sup> OR (95% CI), p-value | Interaction p-value | Adjusted <sup>b</sup> OR (95% CI), p-value | Interaction p-value |
|------------------------------------|------------|------------|--------------------------------------------|---------------------|--------------------------------------------|---------------------|
| <b>Gender</b>                      |            |            |                                            |                     |                                            |                     |
| Boys                               | 109 (42.9) | 83 (31.8)  | 1.61 (1.13 to 2.32), 0.009                 | 0.034               | 1.62 (1.13 to 2.33), 0.009                 | 0.039               |
| Girls                              | 132 (54.1) | 126 (55.8) | 1.03 (0.76 to 1.39), 0.87                  |                     | 0.94 (0.65 to 1.37), 0.76                  |                     |
| <b>Maternal age at recruitment</b> |            |            |                                            |                     |                                            |                     |
| <16 years                          | 18 (54.6)  | 9 (22.5)   | 4.67 (1.47 to 14.84), 0.009                | 0.016               | 5.28 (1.49 to 18.73), 0.010                | 0.018               |
| ≥16 years                          | 223 (48.0) | 200 (44.7) | 1.13 (0.87 to 1.47), 0.35                  |                     | 1.15 (0.89 to 1.50), 0.29                  |                     |
| <b>Adaptive functioning</b>        |            |            |                                            |                     |                                            |                     |
| No difficulty                      | 189 (52.5) | 174 (46.7) | 1.26 (0.93 to 1.70), 0.14                  | 0.72                | 1.26 (0.93 to 1.70), 0.14                  | 0.67                |
| Difficulty in basic skills         | 52 (37.7)  | 34 (30.1)  | 1.41 (0.77 to 2.58), 0.26                  |                     | 1.53 (0.81 to 2.90), 0.19                  |                     |
| <b>NEET</b>                        |            |            |                                            |                     |                                            |                     |
| EET (no not EET)                   | 109 (47.8) | 119 (52.2) | 0.82 (0.56 to 1.19), 0.29                  | 0.019               | 0.82 (0.56 to 1.19), 0.29                  | 0.028               |
| NEET                               | 105 (49.1) | 77 (38.3)  | 1.56 (1.05 to 2.30), 0.027                 |                     | 1.56 (1.05 to 2.30), 0.027                 |                     |
| <b>Deprivation quintile</b>        |            |            |                                            |                     |                                            |                     |
| 1 – least deprived                 | 63 (53.9)  | 39 (42.9)  | 1.65 (0.90 to 3.05), 0.11                  | 0.89                | 1.83 (0.95 to 3.51), 0.07                  | 0.86                |
| 2                                  | 48 (46.2)  | 46 (44.7)  | 1.00 (0.52 to 1.95), 0.99                  |                     | 1.04 (0.53 to 2.03), 0.92                  |                     |
| 3                                  | 46 (50.6)  | 49 (46.7)  | 1.20 (0.67 to 2.15), 0.53                  |                     | 1.22 (0.66 to 2.26), 0.53                  |                     |
| 4                                  | 40 (45.5)  | 35 (38.5)  | 1.28 (0.70 to 2.35), 0.42                  |                     | 1.28 (0.69 to 2.35), 0.43                  |                     |
| 5 – most deprived                  | 42 (44.2)  | 39 (41.1)  | 1.16 (0.64 to 2.08), 0.629                 |                     | 1.17 (0.64 to 2.14), 0.602                 |                     |

<sup>a</sup> FNP compared to usual care. Analysis adjusted for stratification (site), minimisation variables (gestational age, smoking status at recruitment, and first or preferred language); <sup>b</sup> Analysis additionally adjusted for month of birth. N/EET – Not/In Education, Employment or Training (Source: National Pupil Database, The Department for Education).

#### Domestic abuse and CIN status:

Domestic abuse experienced by the mother was assessed using the Composite Abuse Scale (CAS) in the BB:0-2 trial at 24 months follow-up (with a score 1 or greater indicating some sort of abuse). The CAS could only be administered if the interview was face-to-face (as opposed to by telephone) and only if the participant was alone (N=607). In the BB:2-6 sample, this could be examined in 595 participants (FNP:322, Usual Care:273) and the proportion of participants experiencing some form of abuse was comparable to that found in the BB:0-2 trial (FNP: 122 (27.9%) vs UC:113 (41.4%)). There was also a relationship found between CAS and CIN status with 49 (20.9%) participants who experienced some abuse having a child being in need versus 42 (11.8%) of those who did not experience abuse. Domestic abuse at 24 months was to be explored as a possible effect mediator but due to lack of intervention effect in the child's CIN status, the need to examine the proportion of effect mediated by experience of domestic abuse at 24 months was redundant.

#### Care-experienced mothers and CIN status:

In addition, care-experienced mothers at time of recruitment to the BB:0-2 trial was examined. This was defined from the CLA dataset. Sixty-one mothers were identified as having experienced a period of care, four of whom were identified as care-experienced only after their BB:0-2 recruitment date. Fifty-seven mothers were examined for their duration of care and the women randomised to receive FNP experienced on average nine months more care than the Usual care arm (median (25th to 75th centile) FNP: 40 (15.5 to 113.0) UC: 31 (7.0 to 69.5) months). After merging these care-experienced mothers into the children's dataset, 56 mothers remained; seven mothers were excluded from the subgroup analyses since their child did not have any NPD data. Children of these care-experienced mothers were at a higher risk of being defined as in need themselves but no interaction was observed between trial arm and mothers care status. The duration of the maternal care status as a possible mediator effect was also stated in the statistical analysis plan but similarly to domestic abuse, due to lack of intervention effect in child's CIN status, then the need to examine the proportion of effect mediated by length of mother's care experience was redundant.

### **VIII. Treatment efficacy**

The analyses of the following outcomes were re-run to investigate the effect of FNP dosage (number of visits over all delivery phases) using complier averaged causal effects modelling by fitting a structural mean model. The programme stated maximum number of visits over the whole period of FNP is 64 (14 in the pregnancy phase, 28 in the infancy phase, 22 in the toddler phase).

Referrals to CSC services: Adjusting the analysis for receipt of full dosage of FNP visits, made no difference to the conclusion of the main analysis for referral to social services (efficacy per visit odds ratio (OR)=1.00, 95% CI=0.99 to 1.004, p=0.613).

CIN status: Adjusting the analysis for receipt of FNP made no difference to the conclusion of the primary outcome (efficacy per visit OR=1.00, 95% CI=0.99 to 1.004, p=0.613).

Early Years assessment total point score: Adjusting the analysis for receipt of FNP we observe a 0.02 increase in point score in the between-arm mean difference in early years total score (as the number of visits increase so does the score) however the confidence interval around this estimate is wide (-0.004 to 0.040). The estimated treatment efficacy for participants receiving all 64 visits was 1.15 (95% CI - 0.26 to 2.56), p=0.106 showing no change to the overall conclusions compared to the primary analysis.

KS1 attainment: Adjusting the analysis for FNP receipt we observe an increase in the odds of an event occurring in the FNP arm compared UC arm for every unit increase in FNP visit received. For all areas of learning (reading, writing, maths and science), adjusting the analysis for FNP receipt strengthens the effect of FNP, but it is the reading and writing assessment where given the full dosage of 64 FNP visits the odds make a significant difference. For reading assessments, the odds of reaching the expected standard increases from OR=1.23 (95% CI=0.99 to 1.53), p=0.051 in the main analysis to 1.38 (1.07 to 1.77), p=0.015. The efficacy per visit for reading was 1.005 (1.001 to 1.009), p=0.015; maths: 1.001 (0.997 to 1.005), p=0.535; science: 1.004 (0.999 to 1.008), p=0.112; writing: 1.013 (1.09 to 1.017), p=0.001.

## IX. Exploration of surveillance bias upon Child In Need outcome assessment

**Table S18 Baseline maternal characteristics, school readiness outcomes for children referred to CSC and classed as a Child In Need, before the age of 4 years old by intervention arm.**

|                                                                                                           | FNP<br>N=60         | Usual Care<br>N=62  | OR (95% CI)         |
|-----------------------------------------------------------------------------------------------------------|---------------------|---------------------|---------------------|
| <b>Maternal age (years) at recruitment</b><br><i>Median (25<sup>th</sup> to 75<sup>th</sup> centiles)</i> | 17.7 (16.9 to 18.3) | 17.8 (16.7 to 18.7) | 0.97 (0.73 to 1.27) |
| <b>Not in Education, Employment or Training at recruitment</b> N(%)                                       |                     |                     |                     |
| Education, Employment or Training                                                                         | 21 (42.0)           | 11 (22.0)           |                     |
| Not in Education, Employment or Training                                                                  | 30 (58.0)           | 39 (78.0)           | 2.45 (1.04 to 5.93) |
| Not applicable (<16 years at interview)/ missing                                                          | 9                   | 12                  |                     |

|                                                                                                                  |                     |                     |                                        |
|------------------------------------------------------------------------------------------------------------------|---------------------|---------------------|----------------------------------------|
| <b>Ethnicity</b> N(%)                                                                                            | Numbers too small   |                     |                                        |
| <b>Deprivation score</b> <sup>1</sup><br>Median (25 <sup>th</sup> to 75 <sup>th</sup> centiles)                  | 43.0 (25.0 to 56.1) | 45.0 (31.8 to 62.7) | 0.99 (0.98 to 1.01)                    |
| <b>Adaptive functioning</b>                                                                                      |                     |                     |                                        |
| Had 3 or less life skills                                                                                        |                     |                     |                                        |
| No                                                                                                               | 38 (63.3)           | 43 (69.4)           |                                        |
| Yes                                                                                                              | 22 (36.7)           | 19 (30.6)           | 1.41 (0.67 to 2.98)                    |
| <b>Difficulty in at least one basic skills</b><br>N(%)                                                           |                     |                     |                                        |
| No                                                                                                               | 37 (61.7)           | 43 (69.4)           |                                        |
| Yes                                                                                                              | 23 (38.3)           | 19 (30.6)           | 1.31 (0.62 to 2.8)                     |
| <b>At least one burden</b> N(%)                                                                                  |                     |                     |                                        |
| No                                                                                                               | 39 (65.0)           | 42 (68.9)           |                                        |
| Yes                                                                                                              | 21 (35.0)           | 19 (31.1)           | 1.19 (0.56 to 2.54)                    |
| <b>Social support</b>                                                                                            |                     |                     |                                        |
| Maximum social support N(%)<br>(score=100)                                                                       | 10 (16.9)           | 9 (14.5)            | 1.20 (0.45 to 3.21)                    |
| <b>Relationship quality</b> (score 7 to 35) <sup>2</sup>                                                         | 28 (25 to 30)       | 30 (25 to 32)       | 0.97 (0.89 to 1.05)                    |
| <b>Self-efficacy</b> (score 10 to 40) <sup>3</sup><br>Median (25 <sup>th</sup> to 75 <sup>th</sup> centiles)     | 30 (28 to 32)       | 30 (27.25 to 31)    | 1.05 (0.97 to 1.15)                    |
| <b>Family resource</b> (score 4 to 20) <sup>4</sup><br>Mean (SD)                                                 | 12.6 (4.2)          | 12.7 (3.9)          | 0.91 (0.64 to 1.30)                    |
| <b>CRAFFT</b> (score 0 to 6) <sup>5</sup><br>Median (25 <sup>th</sup> to 75 <sup>th</sup> centiles)              | 1 (0 to 2)          | 1 (0 to 2)          | 1.07 (0.85 to 1.35)                    |
| <b>Early Years</b>                                                                                               |                     |                     |                                        |
| <b>GLD in all 5 areas of learning</b> N(%)                                                                       | 26 (44.1)           | 22 (37.9)           | 1.29 (0.62 to 2.70)                    |
| <b>GLD in all 17 early learning goals</b><br>N(%)                                                                | 26 (44.1)           | 20 (34.5)           | 1.50 (0.71 to 3.16)                    |
| <b>Total point score over all 17 early learning goals</b> Median (25 <sup>th</sup> to 75 <sup>th</sup> centiles) | 32 (22 to 34)       | 30.5 (21 to 34)     | Mean difference = 1.66 (-1.14 to 4.45) |

<sup>1</sup> Higher score indicates more deprived, <sup>2</sup> Higher score indicates a better relationship quality, <sup>3</sup> Higher score indicates higher level of self-efficacy, <sup>4</sup> Higher score indicates higher level of family resource, <sup>5</sup> Greater risk of problems related to drugs and alcohol

## X. Missing data

Since only a small number (n=40 (2.7%)) of children were not linked to any NPD dataset and not included in the primary outcome analyses, no multiple imputation was carried out.

## XI. Cost Consequence Analysis

**Table S19 Cost-consequence balance sheet for the family-nurse based intervention for the four years between children's ages 2 and 6.**

| <b>Mothers</b>                                                         |                                   |               |                                    |                               |               |                                    |
|------------------------------------------------------------------------|-----------------------------------|---------------|------------------------------------|-------------------------------|---------------|------------------------------------|
|                                                                        | Mean resource use per participant |               |                                    | Mean cost per participant (£) |               |                                    |
|                                                                        | FNP                               | Usual<br>Care | Incremental<br>(FNP-Usual<br>Care) | FNP                           | Usual<br>Care | Incremental<br>(FNP-Usual<br>Care) |
| <b>Health related resource use</b>                                     |                                   |               |                                    |                               |               |                                    |
| <i>Inpatient Attendances</i>                                           |                                   |               |                                    |                               |               |                                    |
| Overnight admissions (N)                                               | 3.04                              | 2.99          | 0.05                               |                               |               |                                    |
| Overnight length of stay (N<br>nights)                                 | 2.32                              | 2.32          | 0.00                               | 2,826.79                      | 2,844.58      | -17.79                             |
| Day Admittances                                                        | 2.93                              | 2.91          | 0.02                               | 1,874.61                      | 1,890.11      | -15.50                             |
| <i>Outpatient Attendances</i>                                          |                                   |               |                                    |                               |               |                                    |
| All Outpatient Attendances                                             | 23.29                             | 22.61         | 0.68                               | 2,244.62                      | 2,189.32      | 55.30                              |
| <i>Accident and Emergency</i>                                          |                                   |               |                                    |                               |               |                                    |
| A&E Visits (N)                                                         | 5.19                              | 4.93          | 0.26                               | 411.34                        | 392.03        | 19.31                              |
| <i>Total Resource Use</i>                                              |                                   |               |                                    |                               |               |                                    |
|                                                                        |                                   |               |                                    | 7,357.36                      | 7,316.04      | 41.32<br>p=0.393                   |
| <b>Children</b>                                                        |                                   |               |                                    |                               |               |                                    |
|                                                                        | Mean resource use per participant |               |                                    | Mean cost per participant (£) |               |                                    |
|                                                                        | FNP                               | Usual<br>Care | Incremental<br>(FNP-Usual<br>Care) | FNP                           | Usual<br>Care | Incremental<br>(FNP-Usual<br>Care) |
| <b>Health related resource use</b>                                     |                                   |               |                                    |                               |               |                                    |
| <i>Inpatient Attendances - All</i>                                     |                                   |               |                                    |                               |               |                                    |
| Overnight admissions (N)                                               | 1.57                              | 1.55          | 0.02                               |                               |               |                                    |
| Overnight length of stay (N<br>nights)                                 | 3.57                              | 3.39          | 0.18                               | 1,962.95                      | 2,033.71      | -70.76                             |
| Day Admittances                                                        | 0.98                              | 0.97          | 0.01                               | 744.94                        | 724.90        | 20.04                              |
| <i>Inpatient Attendances – All (Excluding Injuries and Ingestions)</i> |                                   |               |                                    |                               |               |                                    |
| Overnight admissions (N)                                               | 1.51                              | 1.49          | 0.02                               | 1,883.44                      | 1,951.15      | -67.71                             |
| Overnight length of stay (N<br>nights)                                 | 3.61                              | 3.44          | 0.17                               |                               |               |                                    |
| Day Admittances                                                        | 0.90                              | 0.88          | 0.02                               | 689.22                        | 667.09        | 22.13                              |

| <i>Inpatient Attendances – Injuries and Ingestions Only</i>             |                                        |      |       |          |          |                   |
|-------------------------------------------------------------------------|----------------------------------------|------|-------|----------|----------|-------------------|
| Overnight admissions (N)                                                | 0.06                                   | 0.06 | 0.00  |          |          |                   |
| Overnight length of stay (N nights)                                     | 2.50                                   | 2.05 | 0.45  | 79.51    | 82.55    | -3.04             |
| Day Admittances                                                         | 0.08                                   | 0.09 | -0.01 | 55.72    | 57.81    | -2.09             |
| <i>Outpatient Attendances</i>                                           |                                        |      |       |          |          |                   |
| All Outpatient Attendances                                              | 6.89                                   | 7.44 | -0.55 | 673.24   | 727.79   | -54.55            |
| <i>Accident and Emergency - All</i>                                     |                                        |      |       |          |          |                   |
| A&E Visits (N)                                                          | 4.93                                   | 4.62 | 0.31  | 395.73   | 366.83   | 28.90             |
| <i>Accident and Emergency - All (Excluding Injuries and Ingestions)</i> |                                        |      |       |          |          |                   |
| A&E Visits (N)                                                          | 3.80                                   | 3.52 | 0.28  | 305.12   | 280.20   | 24.92             |
| <i>Accident and Emergency – Injuries and Ingestions Only</i>            |                                        |      |       |          |          |                   |
| A&E Visits (N)                                                          | 1.12                                   | 1.10 | 0.02  | 75.09    | 69.91    | 5.18              |
| <i>Total Resource Use</i>                                               |                                        |      |       |          |          |                   |
|                                                                         |                                        |      |       | 3,778.13 | 3,853.22 | -75.09<br>p=0.865 |
| <b>Consequences</b>                                                     |                                        |      |       |          |          |                   |
| Child in Need status recorded at any time during the follow-up period.  | OR: 0.98 (95%CI: 0.74 to 1.31) p=0.902 |      |       |          |          |                   |
| Referral to Social Services                                             | OR: 0.97 (0.74 to 1.28) p=0.829        |      |       |          |          |                   |
| Child Protection registration (CPP)                                     | OR: 1.04 (0.69 to 1.57) p=0.846        |      |       |          |          |                   |
| Details of a CPP                                                        |                                        |      |       |          |          |                   |
| • Neglect                                                               | Reference                              |      |       |          |          |                   |
| • Emotional                                                             | OR: 2.77 (1.02 to 7.56) p=0.046        |      |       |          |          |                   |
| • Physical                                                              | OR: 1.25 (0.32 to 4.88) p=0.743        |      |       |          |          |                   |
| • Sexual and multiple                                                   | OR: 1.13 (0.33 to 3.86) p=0.848        |      |       |          |          |                   |
| CIN categorisation                                                      |                                        |      |       |          |          |                   |
| • Abuse or Neglect                                                      | Reference                              |      |       |          |          |                   |
| • Family dysfunction                                                    | OR: 0.95 (0.54 to 1.69) p=0.868        |      |       |          |          |                   |
| • Family in acute stress                                                | OR: 1.47 (0.61 to 3.54) p=0.389        |      |       |          |          |                   |
| • Low income, absent parenting, socially unacceptable behaviour         | OR: 2.38 (0.86 to 6.57) p=0.093        |      |       |          |          |                   |
| • Child/parent disability                                               | OR: 1.47 (0.45 to 4.84) p=0.525        |      |       |          |          |                   |
| Looked after status                                                     | OR: 0.90 (0.52 to 1.57) p=0.712        |      |       |          |          |                   |
| Child looked after period of care (months)                              | OR: 0.75 (0.65 to 0.86) p<0.001        |      |       |          |          |                   |
| DNA appointments                                                        |                                        |      |       |          |          |                   |
| • DNA at least once                                                     | OR: 1.00 (0.79 to 1.26) p=0.997        |      |       |          |          |                   |
| Injuries and ingestions                                                 |                                        |      |       |          |          |                   |
| • Emergency attendance                                                  |                                        |      |       |          |          |                   |
| ○ No                                                                    | Reference                              |      |       |          |          |                   |



|                                                                      |                                 |
|----------------------------------------------------------------------|---------------------------------|
| ○ Yes                                                                | OR: 1.17 (0.95 to 1.45) p=0.149 |
| • Admission to hospital                                              |                                 |
| ○ No                                                                 | Reference                       |
| ○ Yes                                                                | OR: 0.87 (0.63 to 1.20) p=0.407 |
| • Either hospital attendance and/or admission to hospital            |                                 |
| ○ No                                                                 | Reference                       |
| ○ Yes                                                                | OR: 1.11 (0.89 to 1.37) p=0.351 |
| Special Educational Needs                                            | OR: 0.83 (0.67 to 1.03) p=0.097 |
| Early Years assessment                                               |                                 |
| • Achieving good level of development in all five areas of learning  | OR: 1.26 (1.03 to 1.55) p=0.026 |
| • Achieving good level of development in all 17 early learning goals | OR: 1.24 (1.01 to 1.52) p=0.043 |
| School attendance                                                    |                                 |
| • Overall absences                                                   |                                 |
| ○ No absences                                                        | Reference                       |
| ○ At least one absence                                               | OR: 1.00 (0.47 to 2.12) p=0.998 |
| • Overall unauthorised absences                                      |                                 |
| ○ No absences                                                        | Reference                       |
| ○ At least one absence                                               | OR: 0.95 (0.76 to 1.18) p=0.620 |
| • Overall authorised absences                                        |                                 |
| ○ No absences                                                        | Reference                       |
| ○ At least one absence                                               | OR: 1.01 (0.58 to 1.75) p=0.984 |
| KS1 attainment                                                       |                                 |
| • Reading                                                            |                                 |
| ○ Lower than expected                                                | Reference                       |
| ○ Reaching the expected standard                                     | OR: 1.23 (0.99 to 1.53) p=0.051 |
| • Writing academic year 2016/17                                      |                                 |
| ○ Lower than expected                                                | Reference                       |
| ○ Reaching the expected standard                                     | OR: 1.24 (0.97 to 1.60) p=0.090 |
| • Maths                                                              |                                 |
| ○ Lower than expected                                                | Reference                       |
| ○ Reaching the expected standard                                     | OR: 1.04 (0.84 to 1.28) p=0.731 |
| • Science                                                            |                                 |
| ○ Lower than expected                                                | Reference                       |
| ○ Reaching the expected standard                                     | OR: 1.14 (0.91 to 1.43) p=0.254 |

## XII. Postpartum resource use data collected for SPHN contacts

The 6-, 12- and 18-months telephone interview CRF included the following items regarding SPHN (ie health visitor) contacts:

### **6-month interview question:**

Since your baby(ies) was born can I ask how many times you have seen any of the following people?

*Note to interviewer: For each positive question ask & record*

1. How many times do you think you have seen them in that time?
2. Where did you see them (e.g. hospital, clinic, home)?

|                | Number of home visits | Number of clinic visits |
|----------------|-----------------------|-------------------------|
| Health visitor |                       |                         |

### **12-month interview question:**

In the last 6 months can I ask how many times you have seen any of the following people?

*Note to interviewer: For each positive question ask & record*

1. How many times do you think you have seen them in that time?
2. Where did you see them (e.g. hospital, clinic, home)?

|                | Number of home visits | Number of clinic visits |
|----------------|-----------------------|-------------------------|
| Health visitor |                       |                         |

### **18-month interview question:**

In the last 6 months can I ask how many times you have seen any of the following people?

*Note to interviewer: For each positive question ask & record*

1. How many times do you think you have seen them in that time?
2. Where did you see them (e.g. hospital, clinic, home)?

|                | Number of home visits | Number of clinic visits |
|----------------|-----------------------|-------------------------|
| Health visitor |                       |                         |
